# Supplementary material for: Cordycepin promotes browning of white adipose tissue through an AMP-activated protein kinase (AMPK)-dependent pathway
Source: PubMed Central journal article supplement — Acta Pharm Sin B. 2018 Oct 17;9(1):135–43. doi: 10.1016/j.apsb.2018.10.004 (PMC6361849; doi:10.1016/j.apsb.2018.10.004), 2018-10-17
Supplement: mmc1.pdf [file mmc1.pdf]

**Supplementary Information for**

**Original article**

**Cordycepin promotes browning of white adipose tissue through an AMP-activated protein kinase (AMPK)-dependent pathway**

**Guihong Qi<sup>a,†</sup>, Yue Zhou<sup>a,†</sup>, Xiaopo Zhang<sup>b,†</sup>, Jiaqi Yu<sup>a</sup>, Xin Li<sup>a</sup>, Xiaoxue Cao<sup>a</sup>,**

**Chongming Wu<sup>a,\*</sup>, Peng Guo<sup>a,\*</sup>**

*<sup>a</sup>Pharmacology and Toxicology Research Center, Institute of Medicinal Plant*

*Development, Chinese Academy of Medical Sciences & Peking Union Medical*

*College, Beijing 100193, China*

*<sup>b</sup>School of Pharmaceutical Science, Hainan Medical University, Hainan 571199,*

*China*

Received 29 July 2018; received in revised form 11 September 2018; accepted 15

October 2018

<sup>†</sup>These authors made equal contributions to this work.

\*Corresponding authors. Tel.: +86 10 57833235; fax: +86 10 57833018.

E-mail addresses: cmwu@implad.ac.cn (Congming Wu), pguo@implad.ac.cn (Peng

Guo).

**Table S1** Oligonucleotide primers used in this work.

| Name           | Forward (5'–3')        | Reverse (5'–3')         |
|----------------|------------------------|-------------------------|
| CIDEA          | TGCTCTTCTGTATCGCCCAGT  | GCCGTGTTAAGGAATCTGCTG   |
| UCP1           | ACTGCCACACCTCCAGTCATT  | CTTTGCCTCACTCAGGATTGG   |
| PGC1 $\alpha$  | AGCCGTGACCACTGACAACGAG | GCTGCATGGTTCTGAGTGCTAAG |
| FNDC5          | ATGAAGGAGATGGGGAGGAA   | GCGGCAGAAGAGAGCTATAACA  |
| CYTOC          | CCAAATCTCCACGGTCTGTTC  | ATCAGGGTATCCTCTCCCCAG   |
| FATP1          | CGCTTTCTGCGTATCGTCTG   | GATGCACGGGATCGTGTCT     |
| CPT1B          | ACCACTGGCCGCATGT       | CTCCATGGCGTAGTAGTTGCT   |
| $\beta$ -Actin | GGCTGTATCCCCTCCATCG    | CCAGTTGGTAACAATGCCATGT  |

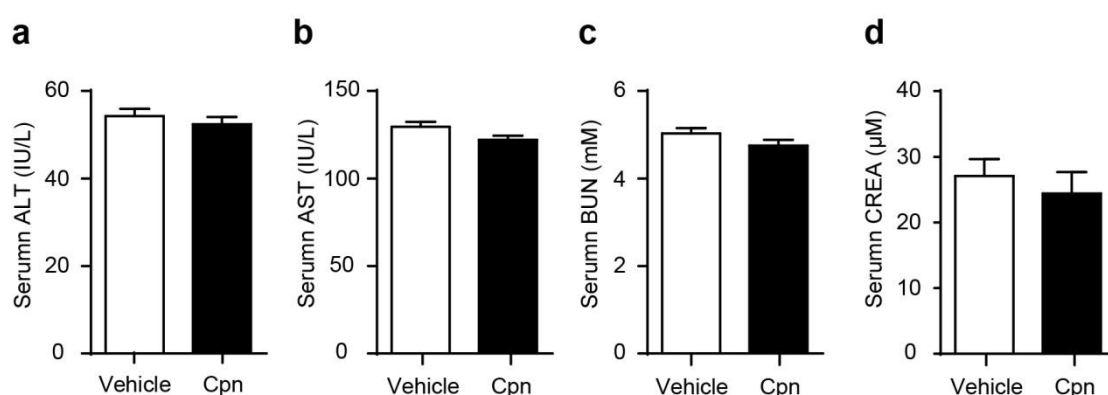

**Figure S1** Cordycepin does not induce toxicity. Serum levels of (a) aspartate aminotransferase (ASAT), (b) alanine aminotransferase (ALAT), (c) urea nitrogen (BUN) and (d) creatinine (CREA) were measured after animals had been treated with cordycepin for 4 weeks ( $n = 7$ ). Data are displayed as mean  $\pm$  s.e.m. Significant differences compared with vehicle controls are assessed by Student's *t*-test. Cpn: cordycepin.

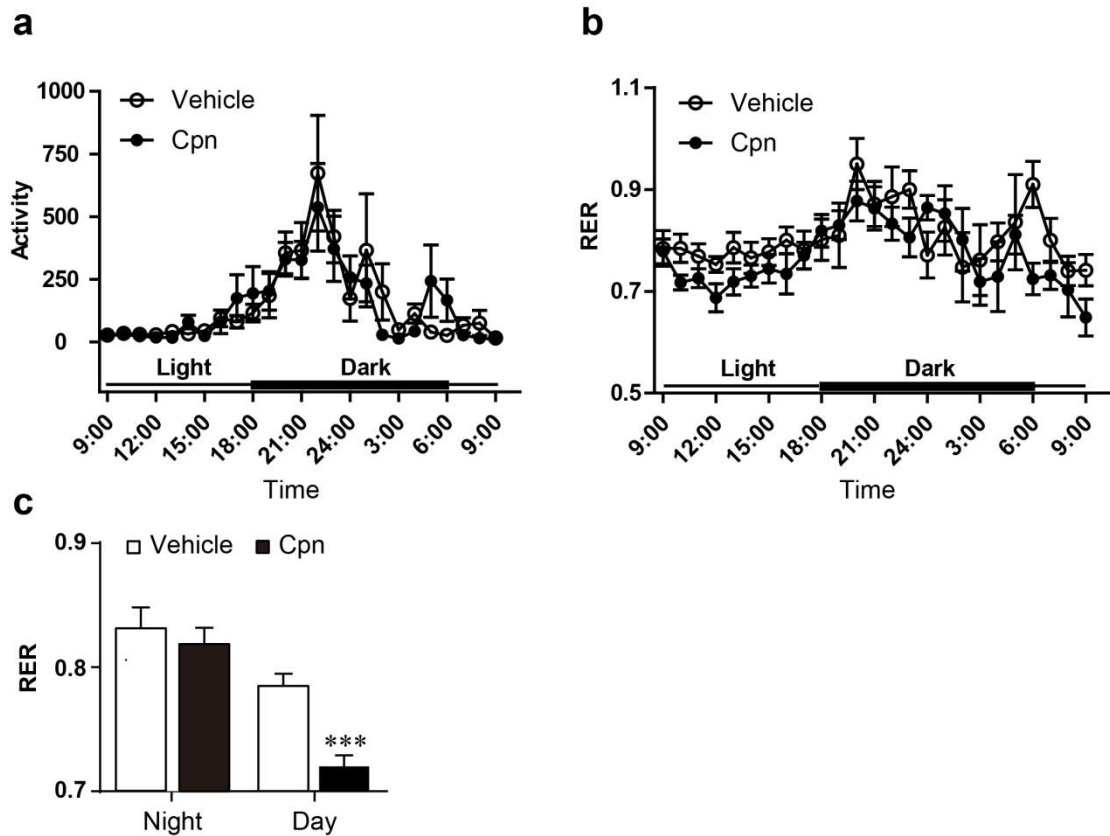

**Figure S2** Cordycepin does not induce hyperactivity but decreases respiratory quotient (RQ) value in day time. (a) Spontaneous activity of mice represented by the average horizontal activities monitored over a 24-h period after 4 weeks of cordycepin treatment in mice ( $n = 7$ ). (b) Respiratory exchange ratio (RER) curve. (c) Average RER of each group in a 24 h cycle. Data are displayed as mean  $\pm$  s.e.m. Significant differences compared with vehicle controls are indicated by  $***P < 0.001$  (assessed by Student's  $t$ -test). Cpn: cordycepin.

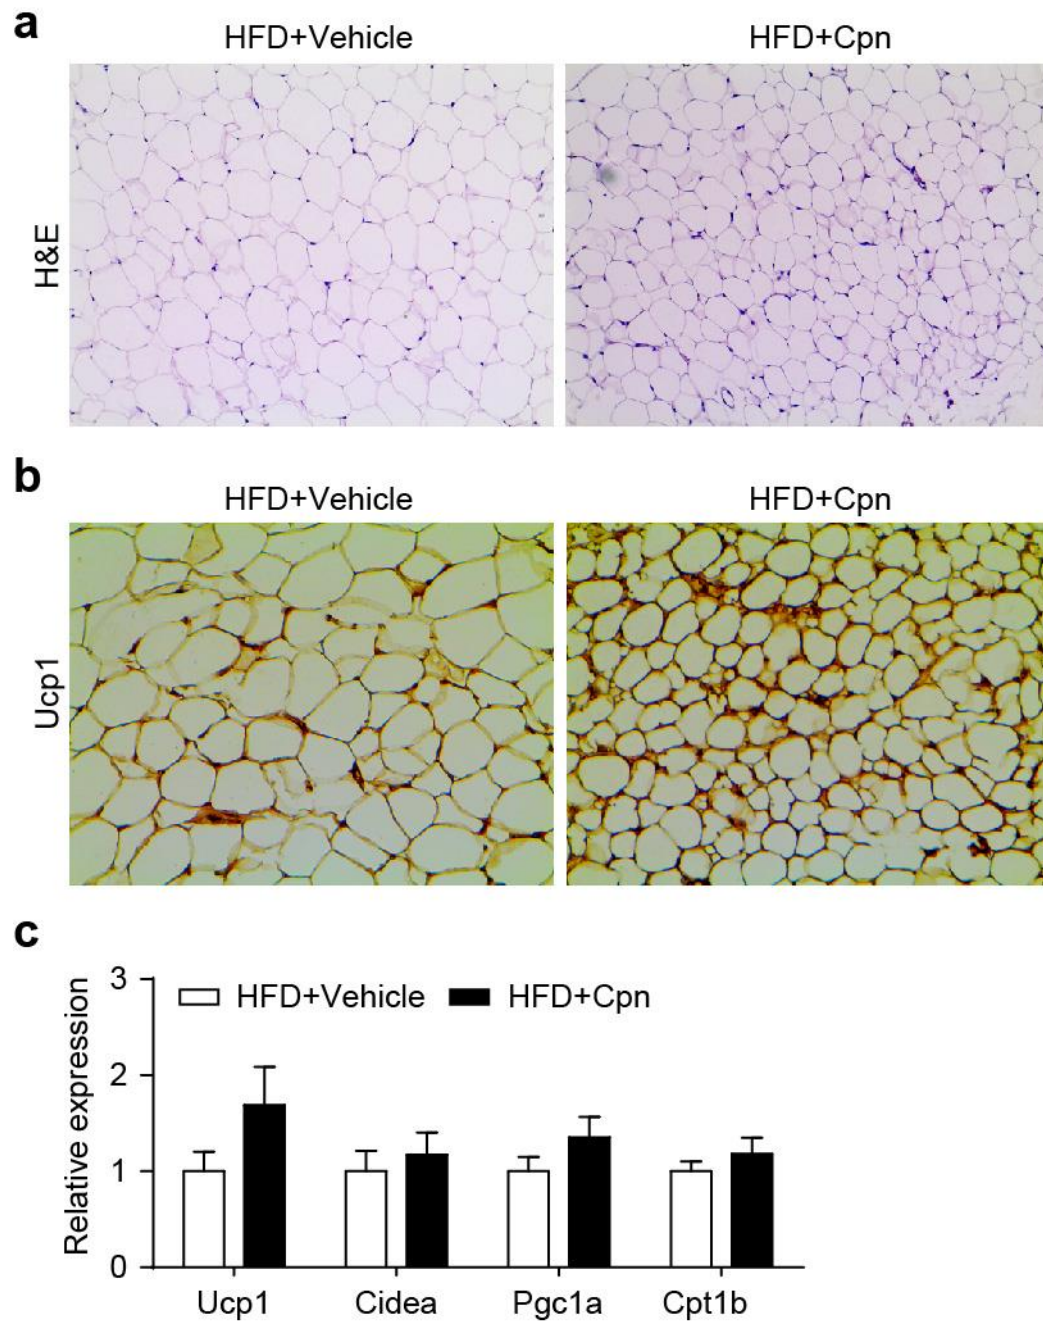

**Figure S3** Cordycepin slightly promotes adipose browning in epididymal WAT. (a) Representative H&E staining image of epididymal WAT (eWAT). (b) Immunoblot analysis of UCP1. (c) Real-time PCR analysis of thermogenic gene expression. Data are displayed as mean  $\pm$  s.e.m. Significant differences compared with vehicle controls are assessed by Student's *t*-test. Cpn: cordycepin.

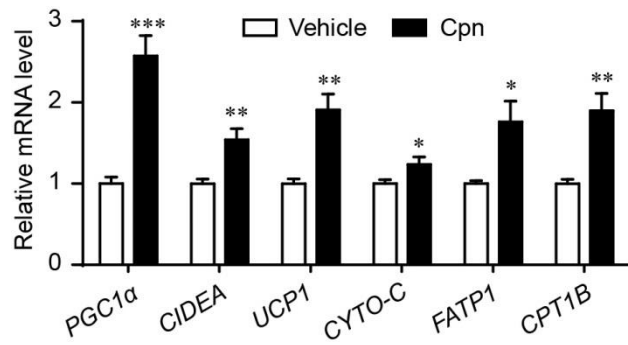

**Figure S4** Cordycepin significantly increases mRNA levels of genes controlling energy expenditure and thermogenic programme in brown adipose tissue (BAT). Data are displayed as mean  $\pm$  s.e.m. Significant differences compared with vehicle controls are assessed by Student's *t*-test. Cpn: cordycepin.

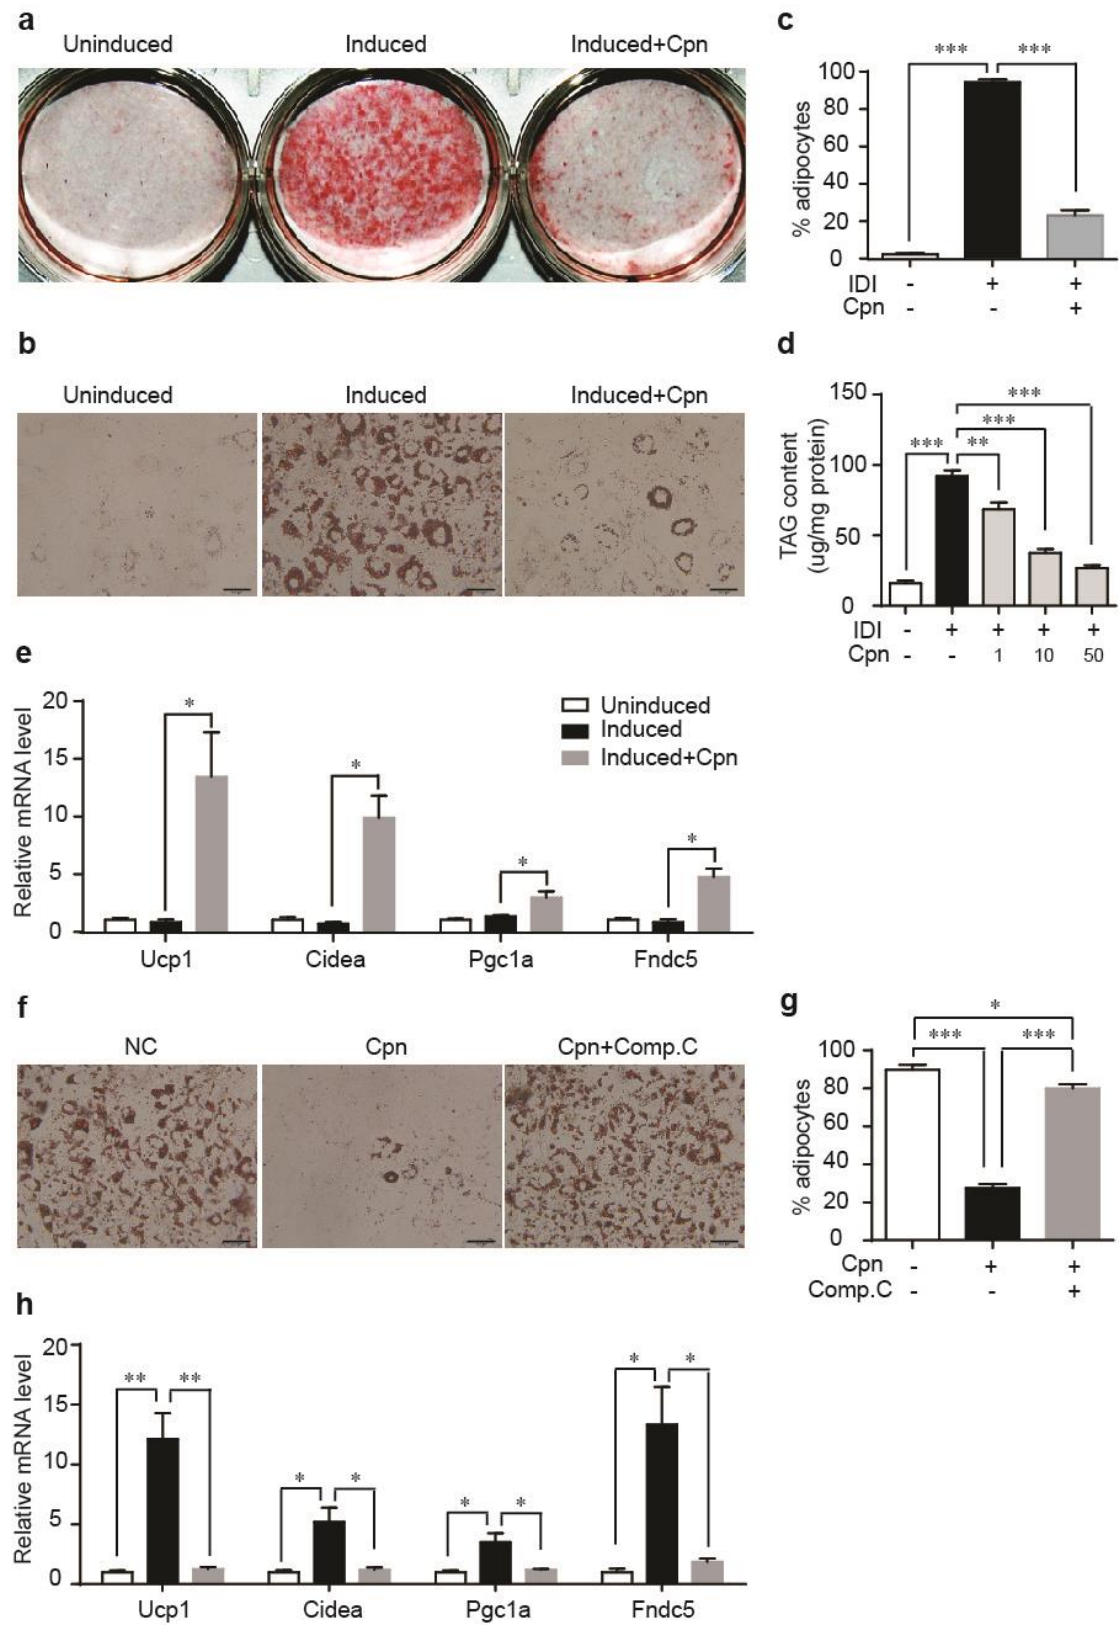

**Figure S5** Cordycepin inhibits adipocyte differentiation in an AMPK-dependent manner. 3T3-L1 pre-adipocytes were differentiated into mature adipocytes in IDI

medium with or without cordycepin. (a) Gross photographs of culture plates after staining by oil red O. (b) Light microscopic analysis of cells stained with oil red O. (c) Percentages of lipid-laden adipocytes. (d) Quantitative analysis of lipid content. (e) Realtime PCR analysis of thermogenic gene expression. (f) Microscopic analysis of cells stained with oil red O under the treatment with compound C. (g) Influence of compound C on the percentage of lipid-laden adipocytes. (h) mRNA levels of thermogenic genes under the treatment by compound C. Data are displayed as mean  $\pm$  s.e.m. Significant differences compared with vehicle controls are indicated by \* $P < 0.05$ , \*\* $P < 0.01$  and \*\*\* $P < 0.001$  (assessed by Student's *t*-test). N.S.: nonsignificance. Cpn: cordycepin; Comp.C: compound C.

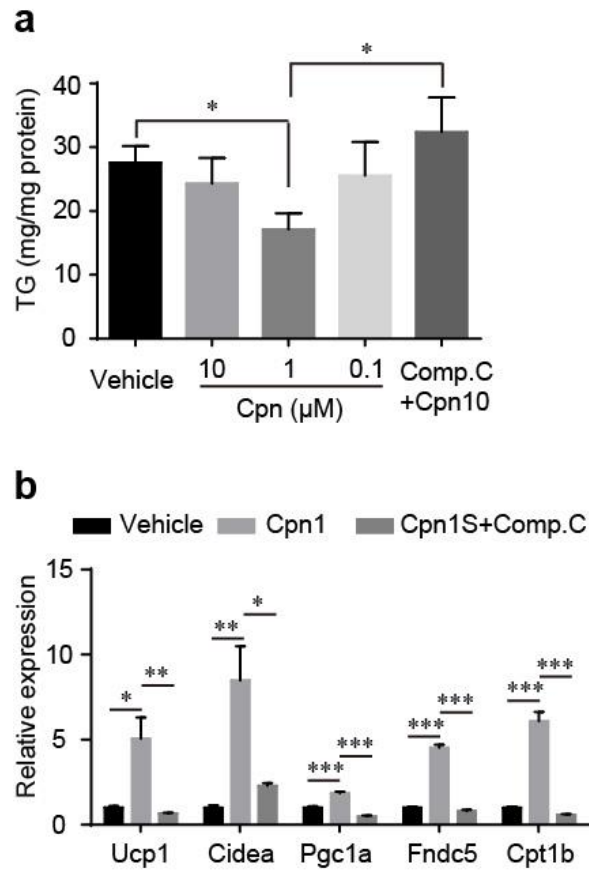

**Figure S6** Cordycepin decreases lipid content (a) and regulates thermogenic genes expression (b) in an AMPK-dependent manner. Data are displayed as mean  $\pm$  s.e.m. Significant differences compared with vehicle controls are indicated by \* $P$ <0.05, \*\* $P$ <0.01 and \*\*\* $P$ <0.001 (assessed by Student's  $t$ -test). N.S.: nonsignificance. Cpn: cordycepin; Comp.C: compound C.
